# Supplementary material for: APOA5 alleviates reactive oxygen species to promote oxaliplatin resistance in PIK3CA-mutated colorectal cancer
Source: publisher site journal article supplement (doi:10.18632/aging.205872), 2024-06-06
Supplement: Supplementary file [file aging-v16i11-205872-supplementary-material-SD1.pdf]

SUPPLEMENTARY FIGURES

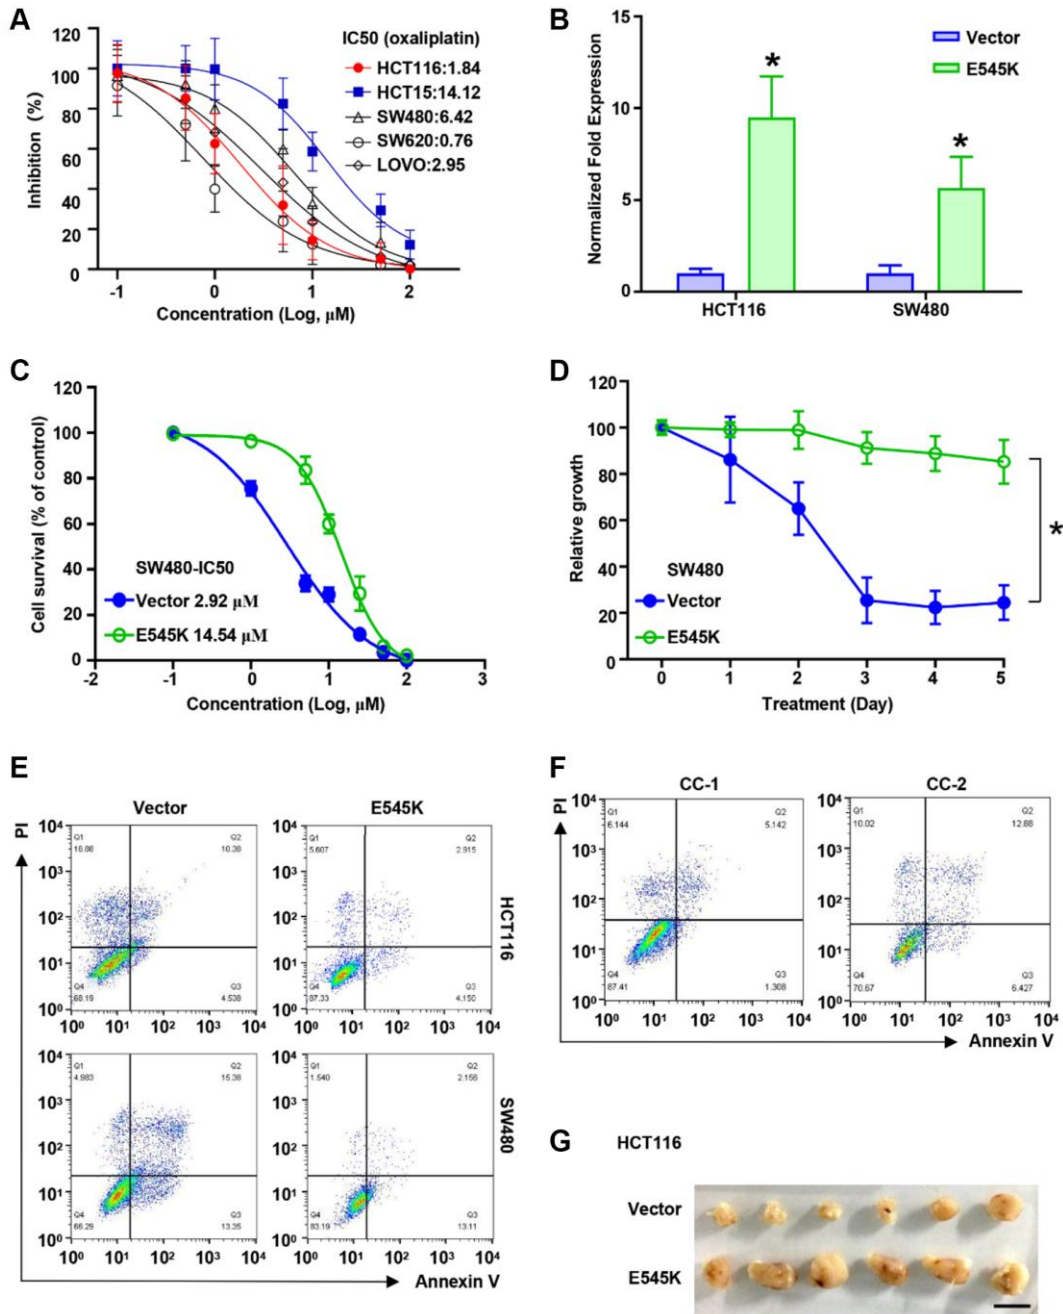

**Supplementary Figure 1. PIK3CA-E545K mutation promotes L-OHP resistance in CRC cells.** (A) IC<sub>50</sub> of CRC cells was determined by treating L-OHP in a dose dependent manner, including HCT15 (PIK3CA-E545K mutation), HCT116 (PIK3CA-H1047R mutation), SW480, SW620, LOVO cells (PIK3CA wild type). (B) Relative PIK3CA mRNA expression was analyzed in PIK3CA-E545K or vector plasmids infected HCT116 and SW480 cells by qRT-PCR.  $\beta$ -actin was used as control. (C) IC<sub>50</sub> of L-OHP was determined by treating PIK3CA-E545K or empty vector infected SW480 cells in a dose dependent manner. (D) Infected SW480/E545K cells were challenged with 2  $\mu$ M L-OHP treatment, which showed increased resistance to L-OHP than the control according to cell viability analysis. (E) The percentage of cell apoptosis activation after 48 hours of 2  $\mu$ M L-OHP exposure was measured by FITC-Annexin V/PI double staining. (F) The percentage of cell apoptosis of primary cells (CC-1/2) of 1  $\mu$ M L-OHP exposure for 48 hours was measured by FITC-Annexin V/PI double staining. (G) Effect of PIK3CA-E545K on xenograft tumor growth was analyzed with subcutaneously injected HCT116 cells with L-OHP treatment (10 mg/kg). Total of 27 days after L-OHP treatment, the xenograft tumors were dissected and presented. Bar = 1 cm.

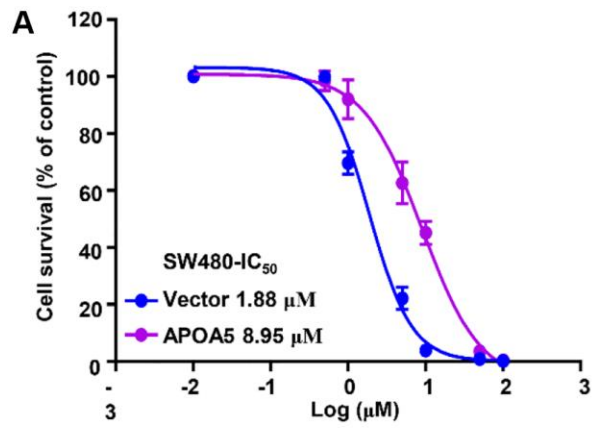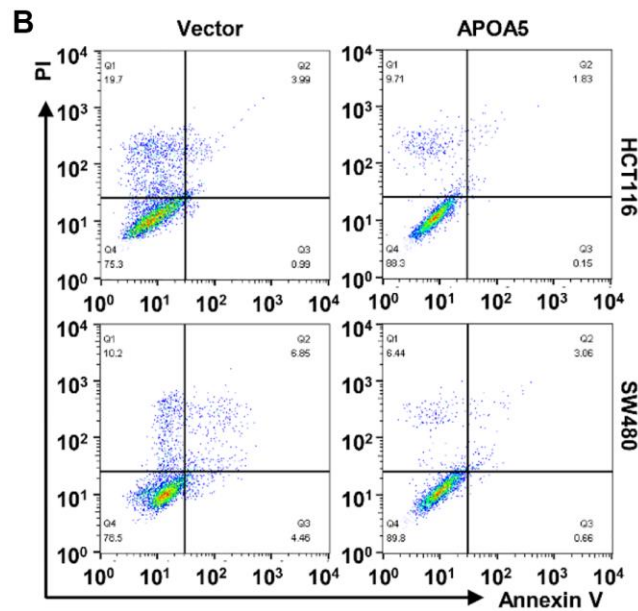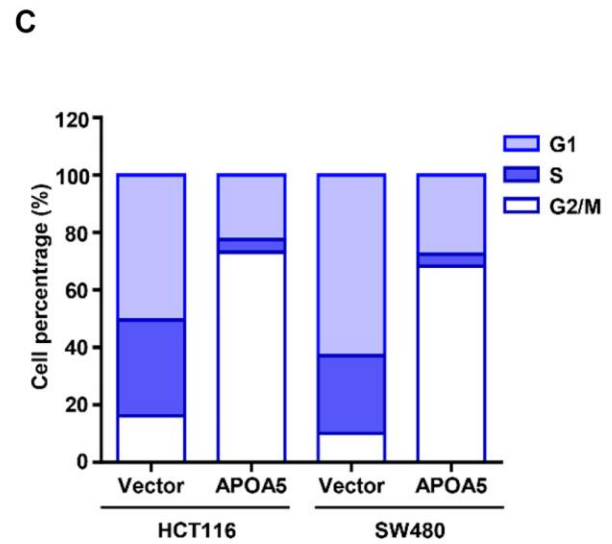

**Supplementary Figure 2. APOA5 contributes to PIK3CA-E545K related L-OHP resistance of CRC cells.** (A) The IC<sub>50</sub> of SW480/APOA5 and control cells was analyzed with cell viability with gradient L-OHP treatment. The IC<sub>50</sub> were 8.95 μM and 1.88 μM, respectively. (B) Flow cytometry was performed to determine cell apoptosis of APOA5 overexpressed HCT116 and SW480 cells which were treated with L-OHP (2 μM). (C) Cell cycle distribution in APOA5 overexpressed cell with L-OHP treatment. All cells were exposed to 2 μM L-OHP for 48 h. After propidium iodide staining, the proportion of cells in cell cycle phases G1, S and G2/M was measured by flow cytometry and quantified by FlowJo.

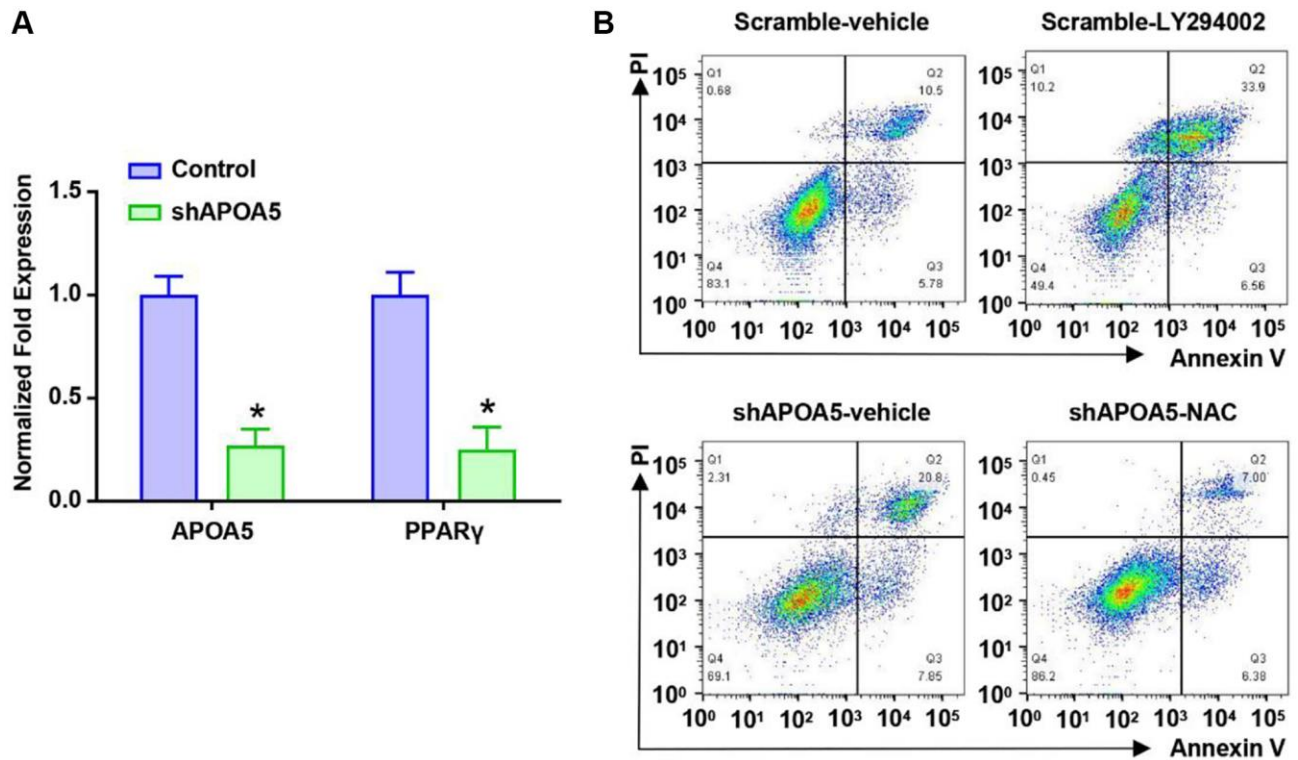

**Supplementary Figure 3. APOA5 alleviates ROS production in PIK3CA-E454K cCRC cells with L-OHP treatment.** (A) Relative APOA5 and PPAR $\gamma$  mRNA expression was analyzed in control or shAPOA5 plasmids infected HCT116-E454K cells by qRT-PCR.  $\beta$ -actin was used as control. (B) Flow cytometry was performed to determine cell apoptosis of HCT116/E454K control and APOA5 overexpressed cells, which was combined with L-OHP (2  $\mu$ M) and LY294002 or NAC for 48 h.

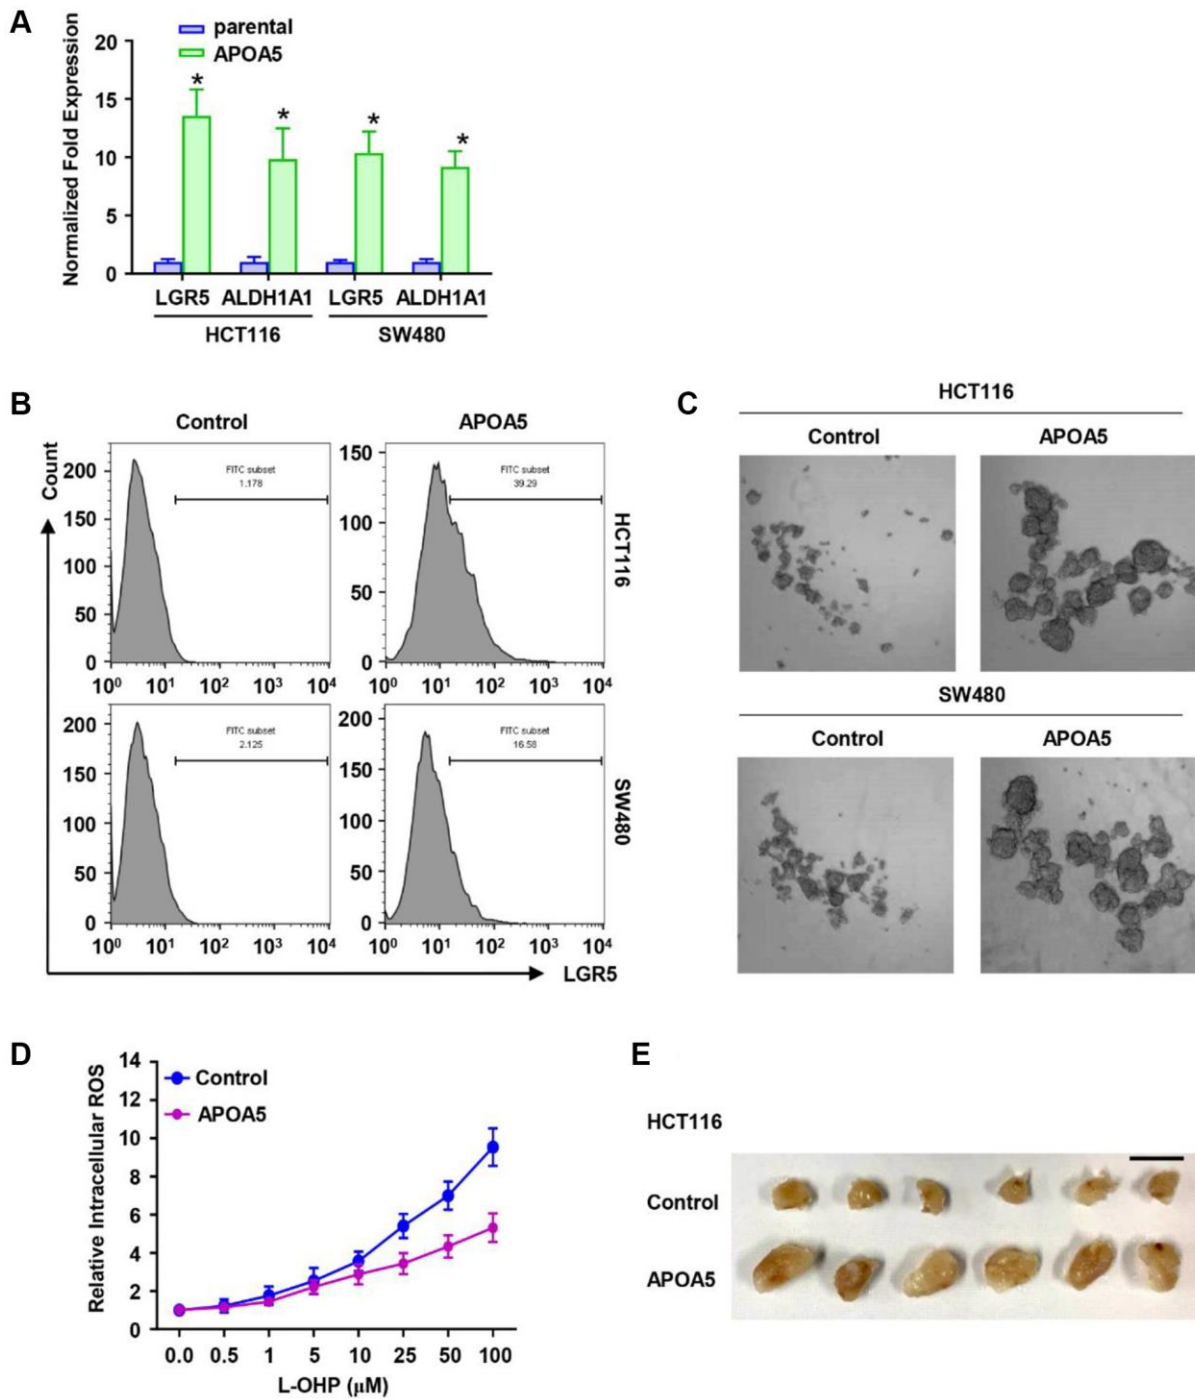

**Supplementary Figure 4. Elevated APOA5 attenuates stemness traits of colorectal cancer cells.** (A) Relative LGR5 and ALDH1A1 mRNA expression was analyzed in parental or APOA5 overexpressing plasmids infected HCT116 and SW480 cells by qRT-PCR.  $\beta$ -actin was used as control. (B) The percentage of LGR5 positive cells in APOA5 overexpressed and parental cells were analyzed with flow cytometry analysis. (C) Representative tumorosphere images of APOA5 overexpressed and parental cells which were treated with L-OHP (1  $\mu$ M). (D) Flow cytometry analysis was performed to evaluate the ROS production of APOA5 overexpressing and control cells with a gradient concentration of L-OHP treatment. Displayed as mean  $\pm$  SD ( $n = 3$ ). (E) Representative dissected tumors of CC1/APOA5 and parental cells ( $1 \times 10^7$  cells injected) were shown. Bar = 1 cm.

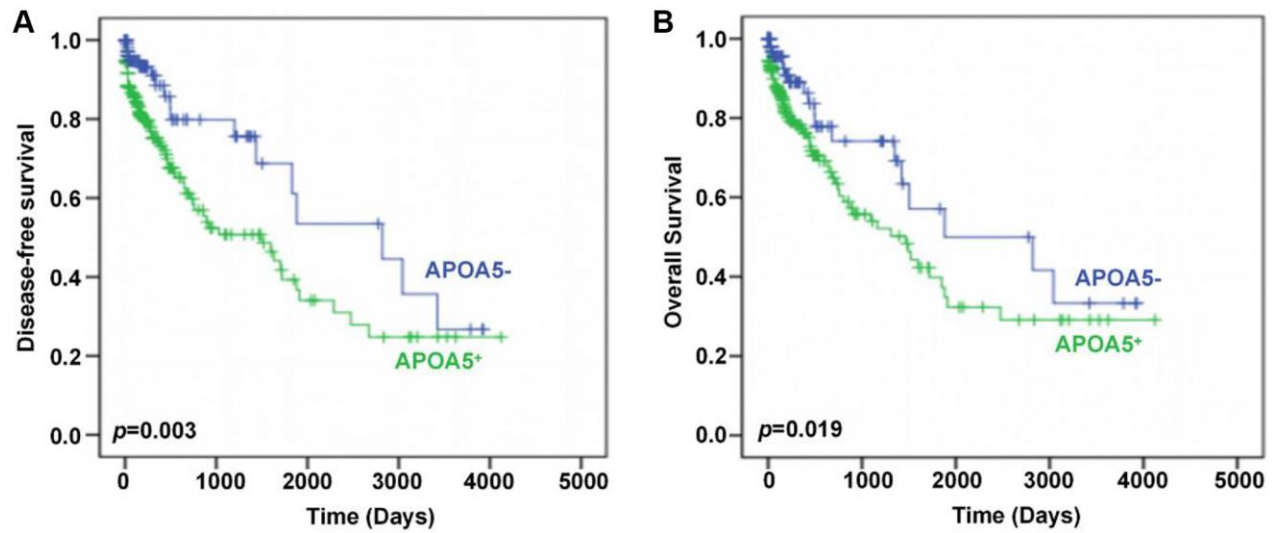

**Supplementary Figure 5. Increased APOA5 mRNA expression predicts favored survival estimation.** (A, B) Kaplan-Meier analysis of the disease-free survival (DFS, A) and overall survival (OS, B) between APOA5 positive and negative tumors in colorectal cancer patients with TCGA database. *P*-value was obtained from two-sided log-rank tests.
