# Supplementary material for: APOA5 alleviates reactive oxygen species to promote oxaliplatin resistance in PIK3CA-mutated colorectal cancer
Source: publisher site journal article supplement (doi:10.18632/aging.205872), 2024-06-06
Supplement: Supplementary file [file aging-v16i11-205872-supplementary-material-SD2.pdf]

## SUPPLEMENTARY TABLE

**Supplementary Table 1. Responses to first-line chemotherapy in patients with APOA5<sup>+</sup> or APOA5<sup>-</sup> colorectal cancer in three independent cohorts.**

| <b>Cohorts</b>           | <b>Patients no.</b> | <b>Resistance</b> | <b>Sensitive</b> | <b><i>p</i>-value</b> |
|--------------------------|---------------------|-------------------|------------------|-----------------------|
| 960 Hospital (I)         |                     |                   |                  |                       |
| APOA5 <sup>+</sup>       | 114                 | 58                | 56               | <0.001                |
| APOA5 <sup>-</sup>       | 302                 | 78                | 224              |                       |
| 971 Hospital (II)        |                     |                   |                  |                       |
| APOA5 <sup>+</sup>       | 91                  | 41                | 50               | <0.001                |
| APOA5 <sup>-</sup>       | 182                 | 64                | 118              |                       |
| Qingdao University (III) |                     |                   |                  |                       |
| APOA5 <sup>+</sup>       | 76                  | 34                | 42               | <0.001                |
| APOA5 <sup>-</sup>       | 122                 | 30                | 92               |                       |
| Total                    |                     |                   |                  |                       |
| APOA5 <sup>+</sup>       | 281                 | 133               | 148              | <0.001                |
| APOA5 <sup>-</sup>       | 606                 | 172               | 434              |                       |

Abbreviations: APOA5, Apolipoprotein A5; 2-sides Chi-Square tests.
